# Supplementary material for: Construction of In2O3 hierarchical microstructures consisting of single crystalline octahedral particles and polycrystalline fibers for detection of low concentration HCHO
Source: Royal Society of Chemistry journal article supplement (doi:10.1039/c9ce01134j), 2019-01-01
Supplement: c9ce01134j1.pdf [file c9ce01134j1.pdf]

## **Electronic Supplementary Information**

### **Construction of In<sub>2</sub>O<sub>3</sub> hierarchical microstructure consisting of single crystalline octahedral particles and polycrystalline fibers for detection of low concentration HCHO**

Hui Li, Yingzi Wang, Qian Ma\*, Shushu Chu, Hang Li, Yi Wang, Ping Yang\*

School of Material Science and Engineering, University of Jinan, 250022, Jinan, P. R.  
China

\*To whom correspondence should be addressed.

E-mail: [mse\\_maq@ujn.edu.cn](mailto:mse_maq@ujn.edu.cn)      [mse\\_yangp@ujn.edu.cn](mailto:mse_yangp@ujn.edu.cn)

Fax: +86-531-87974453, Tel: +86-531-89736225

## Experimental Section

### Materials

Indium chloride ( $\text{InCl}_3$ ) (98 %, Shanghai Macklin Biochemical Co., Ltd), indium nitrate hydrate ( $\text{InN}_3\text{O}_9 \cdot x\text{H}_2\text{O}$ ) (99.9 %, Aladdin Industrial Corporation, China), Polyvinylpyrrolidone (PVP, 1 300 000) (Aladdin Industrial Corporation, China), N,N-dimethylformamide (DMF) and Ethanol (Tianjin Fuyu Fine chemical Co., Ltd) were directly used as received.

### Preparation of other $\text{In}_2\text{O}_3$ samples

The synthetic process of other  $\text{In}_2\text{O}_3$  samples was similar to  $\text{In}_2\text{O}_3$ -FO sample procedure except the calcination temperature of 500, 700, and 800 °C and samples were named as  $\text{In}_2\text{O}_3$ -500,  $\text{In}_2\text{O}_3$ -700, and  $\text{In}_2\text{O}_3$ -800, respectively.

### Characterization

$\text{In}_2\text{O}_3$  samples were prepared by Electrostatic spinning machine (FM-1206, Beijing Future Material Sci-tech Co., Ltd). Scanning Electronic Microscopy (SEM) images and Energy Dispersive Spectrometer (EDS) images of samples were characterized by a field-emission scanning electron microscope (QUANTA 250 FEG, FEI, USA). Transmission electron microscopy (TEM/high-resolution TEM (HRTEM), Tecnai F20, FEI) measured TEM/HRTEM images and selected area electron diffraction (SAED) patterns of samples. X-ray photoelectron spectroscopy (XPS, ESCALAB 250), X-ray diffraction (XRD, D8-ADVANCE of Bruker Corporation,  $\text{CuK}\alpha$  radiation source), a high resolution Raman spectrometer (LabRAM HR Evolution, HORIBA JOBIN YVON SAS), UV-Vis spectrometer (Hitachi U-4100) tested XPS spectra, XRD patterns, Raman spectra, and UV-Vis diffuse reflectance spectra (DRS), respectively. Specific surface area and pore size distribution of samples were obtained

by a multifunction adsorption instrument (MFA-140, Builder Company, Beijing).

## **Fabrication and measurement of gas sensors**

### **Fabrication of gas sensors**

Samples were slightly ground with several drops of water to form a paste, which were coated on Ag-Pd interdigital electrodes, and then obtaining sensors.

### **Performance measurement of gas sensors**

Sensors were dried naturally and then stabilized at 300 °C for 30 min. The gas-sensing performances of samples were evaluated by CGS-4TPs (Beijing Elite Tech Co., Ltd, China). Four sensors were placed in a 1.8 L test chamber. Raising to operating temperature and holding sensors steady for 30 min, resistance was obtained in air, which was named  $R_a$ . Test chamber was closed and a certain amount of HCHO was injected obtaining resistance in HCHO gas, which was named  $R_g$ . The response of gas sensors was defined as  $R_a/R_g$ . Relative humidity and temperature of testing environment are 50 % and 25 °C, respectively. The response and recovery time was defined as the time taken by the sensors to achieve 90 % of the total resistance change.

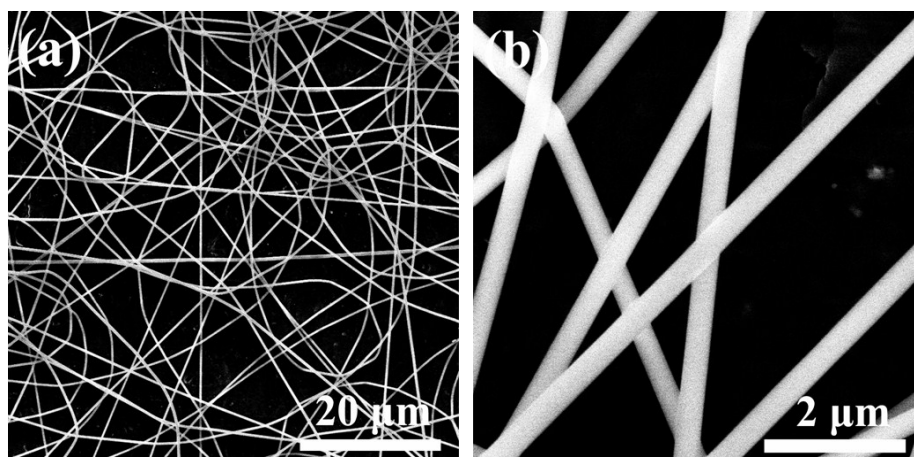

**Fig. S1.** SEM images of precursor fibers ( $\text{In}_2\text{O}_3\text{-FO}$ ).

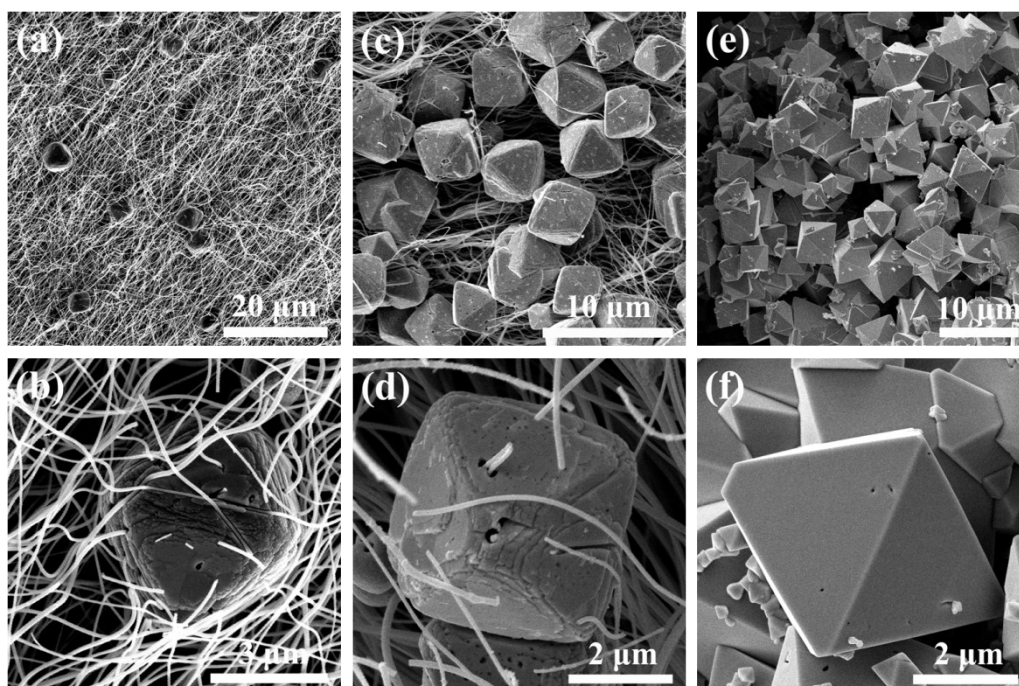

**Fig. S2.** SEM images of  $\text{In}_2\text{O}_3$ -500 (a,b),  $\text{In}_2\text{O}_3$ -700 (c,d) and  $\text{In}_2\text{O}_3$ -800 (e,f).

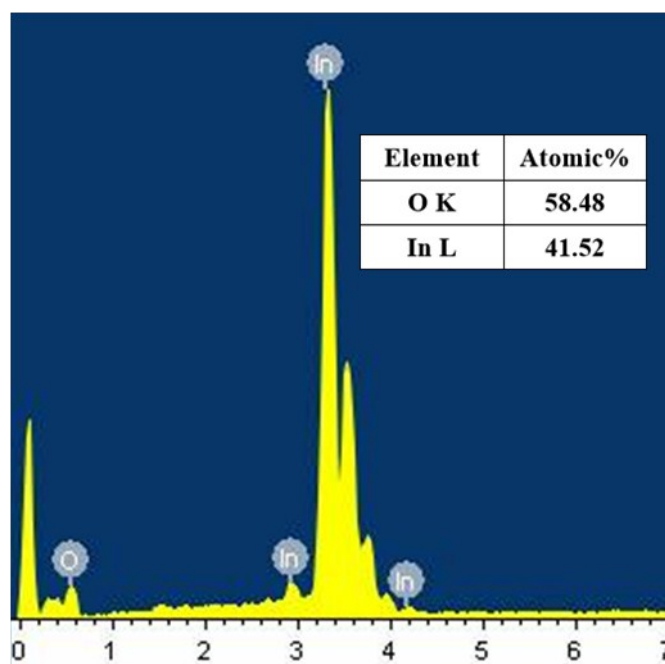

**Fig. S3.** EDS of  $\text{In}_2\text{O}_3\text{-FO}$ .

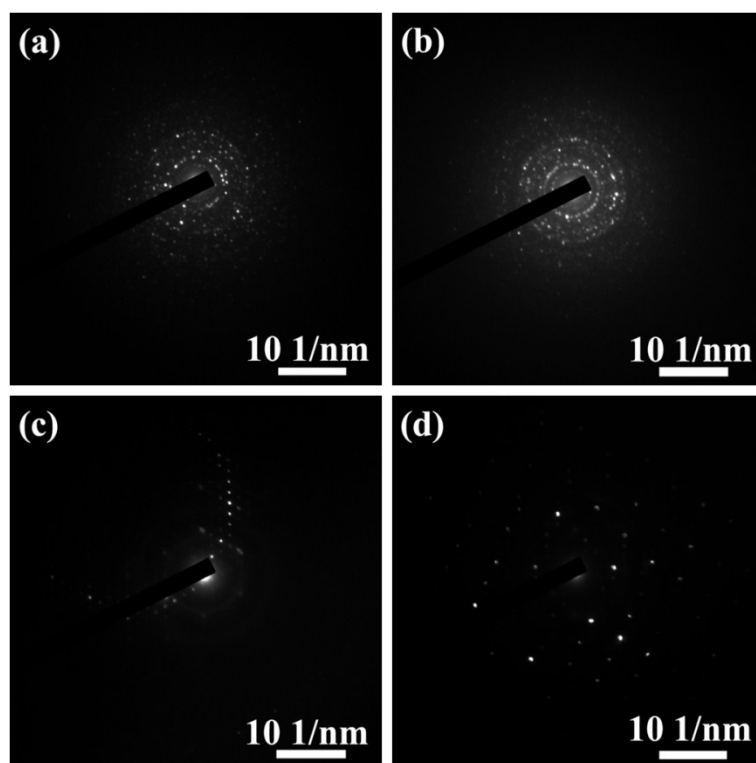

**Fig. S4.** SAED patterns of samples: (a)  $\text{In}_2\text{O}_3\text{-F}$ ; (b and c) fiber and octahedral particle of  $\text{In}_2\text{O}_3\text{-FO}$ ; (d)  $\text{In}_2\text{O}_3\text{-O}$ .

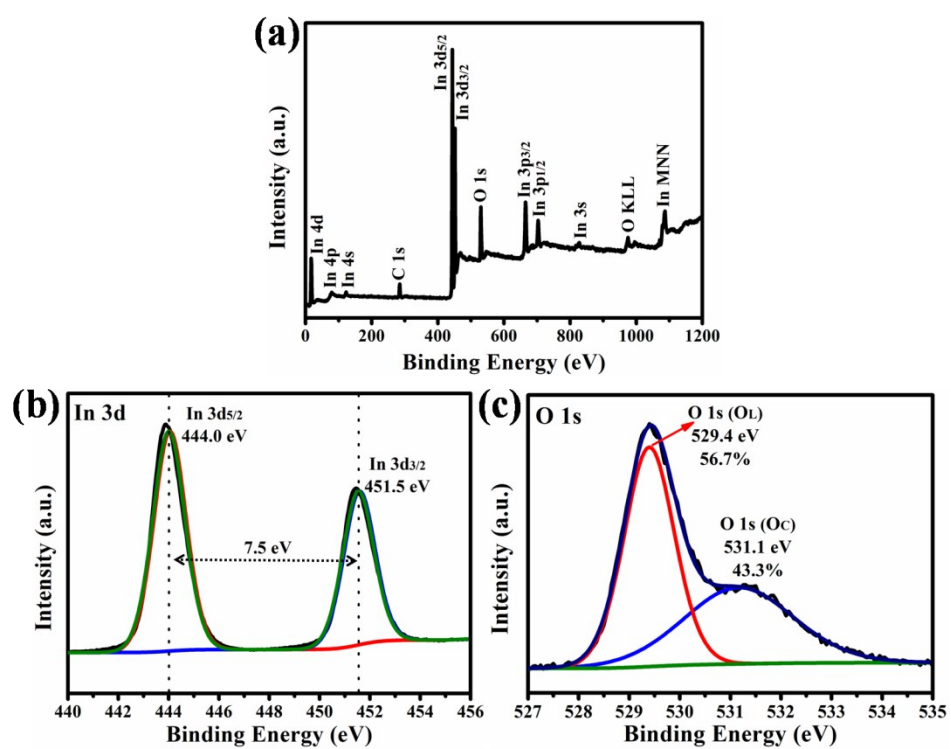

**Fig. S5.** XPS spectra (a-c) of  $\text{In}_2\text{O}_3\text{-FO}$ .



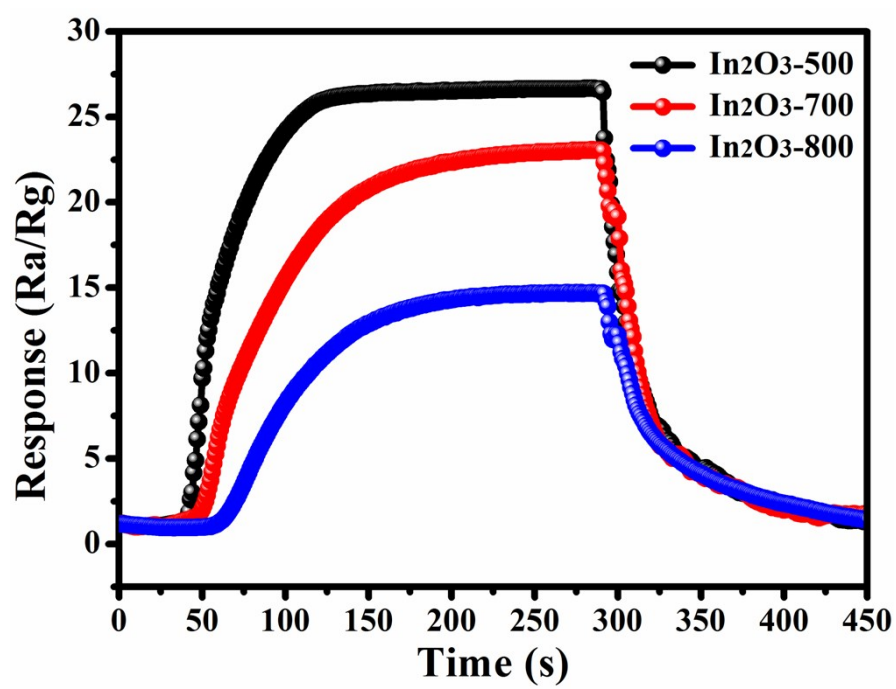

**Fig. S6.** Response curves of different sensors to 5 ppm HCHO at 160 °C.

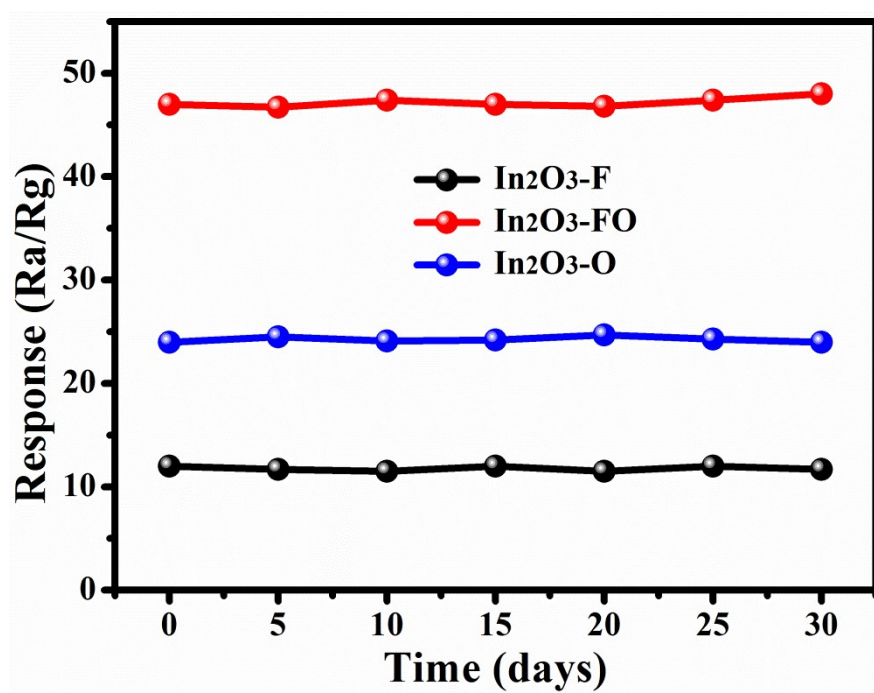

**Fig. S7.** Long-time stability of samples.

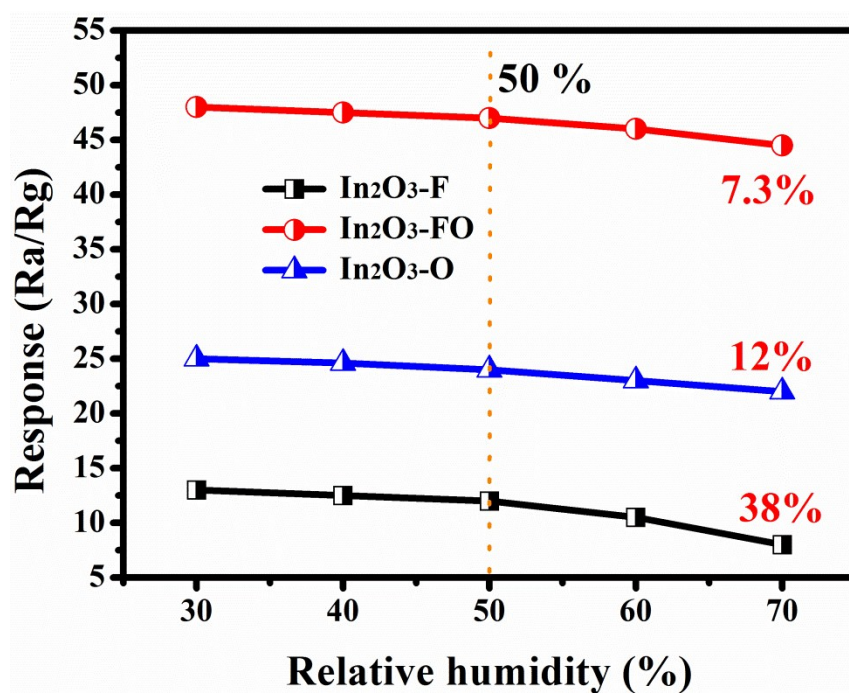

**Fig. S8.** Responses of samples at different relative humidity.

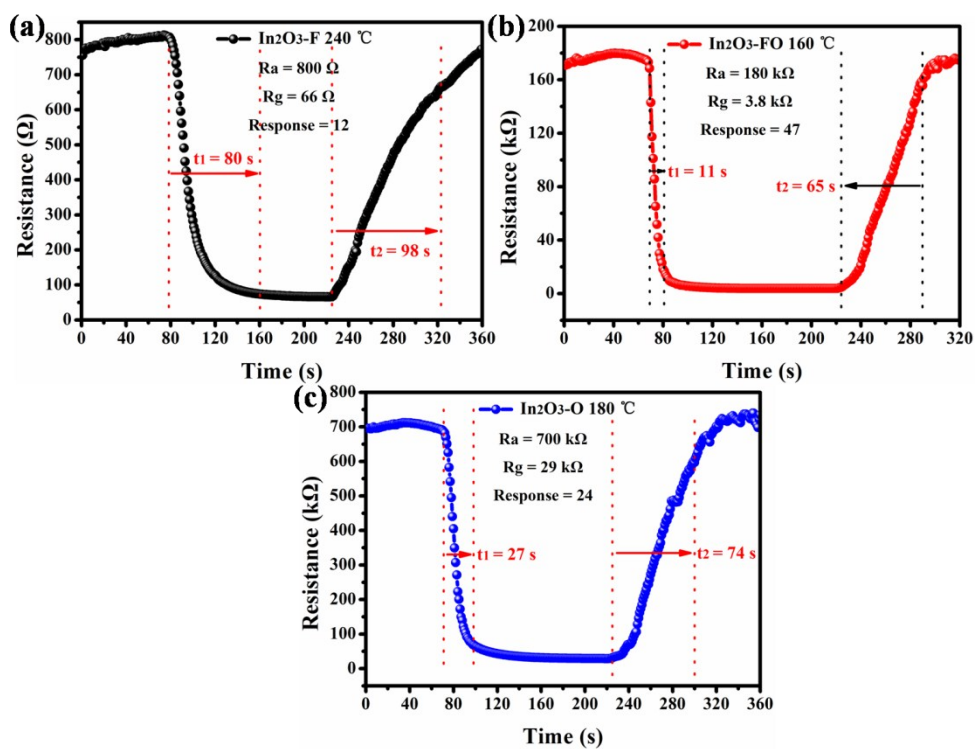

**Fig. S9.** Response and recovery time curves of sensors to 5 ppm HCHO at optimal operating temperature.

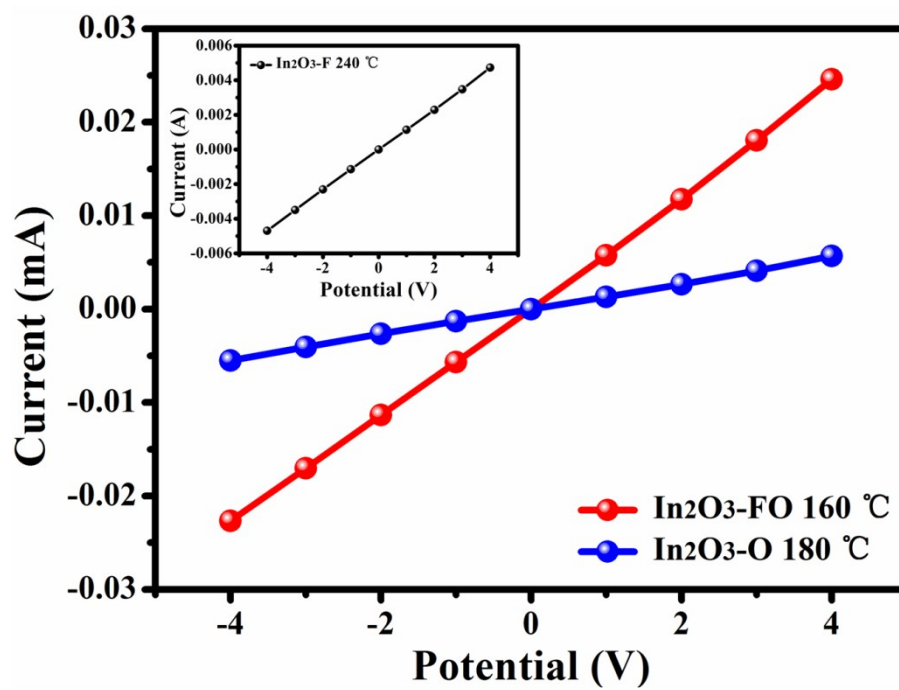

**Fig. S10.** I-V curves of different sensors within a bias from -4 V to +4 V in air.

**Table S1** Comparison of HCHO gas-sensing performances of In<sub>2</sub>O<sub>3</sub>-based materials.

| Material type                                                                | HCHO (ppm) | Temperature (°C) | Response (Ra/Rg) | Response/Recovery time (s) | Ref.      |
|------------------------------------------------------------------------------|------------|------------------|------------------|----------------------------|-----------|
| In <sub>2</sub> O <sub>3</sub> hierarchical architectures                    | 100        | 260              | 8.6              | 1/8                        | S1        |
| Fe-doped In <sub>2</sub> O <sub>3</sub> hollow microspheres                  | 50         | 260              | 9.43             | 6/3                        | S2        |
| Ag-loaded In <sub>2</sub> O <sub>3</sub> hierarchical nanostructures         | 20         | 240              | 11.3             | 0.9/14                     | S3        |
| In <sub>2</sub> O <sub>3</sub> nanoparticles                                 | 100        | 230              | 80               | 100/70                     | S4        |
| WO <sub>x</sub> clusters decorated In <sub>2</sub> O <sub>3</sub> nanosheets | 100        | 170              | 25               | 1/67                       | S5        |
| Ag-functionalized Ni-doped In <sub>2</sub> O <sub>3</sub> nanorods           | 100        | 160              | 123.97           | 1.4/58.2                   | S6        |
| Co-doped In <sub>2</sub> O <sub>3</sub> Nanorods                             | 10         | 130              | 23.2             | 60/120                     | S7        |
| In <sub>2</sub> O <sub>3</sub> hierarchical microstructure                   | 5          | 160              | 47               | 11/65                      | This work |

## References

- [S1] S. Wang, J. Cao, W. Cui, L. Fan, X. Li and D. Li, *Sensors & Actuators: B. Chemical*, 2018, **255**, 159-165.
- [S2] R. Dong, L. Zhang, Z. Zhu, J. Yang, X. Gao and S. Wang, *CrystEngComm*, 2017, **19**, 562-569.
- [S3] S. Wang, B. Xiao, T. Yang, P. Wang, C. Xiao, Z. Li, R. Zhao and M. Zhang, *J. Mater. Chem. A*, 2014, **2**, 6598-6604.
- [S4] F. Gu, C. Li, D. Han and Z. Wang, *ACS Appl. Mater. Interfaces*, 2018, **10**, 933-942.
- [S5] Y. Cao, Y. He, X. Zou and G. D. Li, *Sensors & Actuators: B. Chemical*, 2017, **252**, 232-238.
- [S6] X. Zhang, D. Song, Q. Liu, R. Chen, J. Hou, J. Liu, H. Zhang, J. Yu, P. Liu and J. Wang, *J. Mater. Chem. C*, 2019, **7**, 7219-7229.
- [S7] Z. Wang, C. Hou, Q. De, F. Gu and D. Han, *ACS Sens.*, 2018, **3**, 468-475.
